# Supplementary material for: Tonicity inversely modulates lipocalin-2 (Lcn2/24p3/NGAL) receptor (SLC22A17) and Lcn2 expression via Wnt/β-catenin signaling in renal inner medullary collecting duct cells: implications for cell fate and bacterial infection
Source: PubMed Central journal article supplement (PMC6223074; doi:10.1186/s12964-018-0285-3), 2018-11-07
Supplement: 12964_2018_285_MOESM3_ESM.pdf [file 12964_2018_285_MOESM3_ESM.pdf]

**A**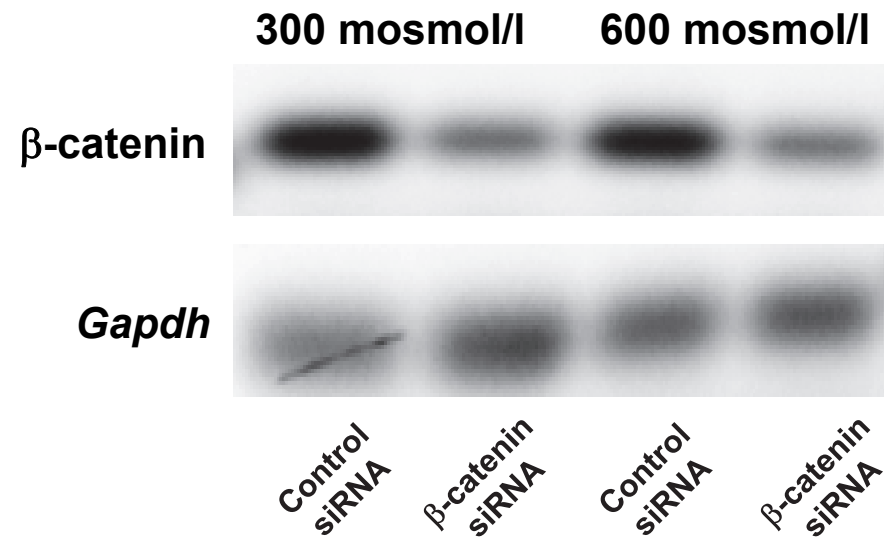**B**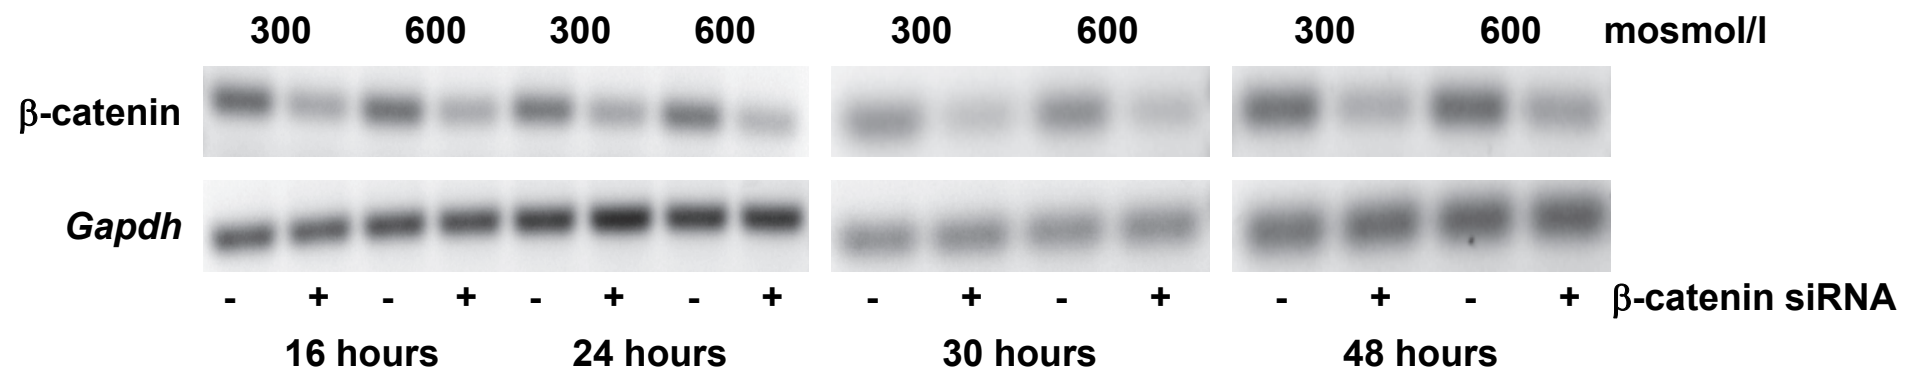**Suppl. Figure 3**
